# Supplementary material for: Assessment of completeness and legibility of handwritten prescriptions in six community chain pharmacies of Asmara, Eritrea: a cross-sectional study
Source: PubMed Central journal article supplement (PMC7310160; doi:10.1186/s12913-020-05418-9), 2020-06-22
Supplement: 12913_2020_5418_MOESM1_ESM.pdf [file 12913_2020_5418_MOESM1_ESM.pdf]

### Data Recording checklist form

| No.                                            | Indicators                   | Coding category                                                                                                                                                                                                                                                                                                                                                                                                             |  |  |  |  |  |  |  |
|------------------------------------------------|------------------------------|-----------------------------------------------------------------------------------------------------------------------------------------------------------------------------------------------------------------------------------------------------------------------------------------------------------------------------------------------------------------------------------------------------------------------------|--|--|--|--|--|--|--|
| 101                                            | Prescription code            | <table border="1" style="display: inline-table; border-collapse: collapse;"> <tr> <td style="width: 20px; height: 20px;"></td> </tr> </table> |  |  |  |  |  |  |  |
|                                                |                              |                                                                                                                                                                                                                                                                                                                                                                                                                             |  |  |  |  |  |  |  |
| <b>Section 1: Patient's Details</b>            |                              |                                                                                                                                                                                                                                                                                                                                                                                                                             |  |  |  |  |  |  |  |
| 102                                            | Name                         | Yes..... 1<br>No..... 2                                                                                                                                                                                                                                                                                                                                                                                                     |  |  |  |  |  |  |  |
| 103                                            | Age                          | Yes.....1 → Write the age _____<br>No..... 2                                                                                                                                                                                                                                                                                                                                                                                |  |  |  |  |  |  |  |
| 104                                            | Sex                          | Yes.....1 → Male..... 1    Female ..... 2<br>No..... 2                                                                                                                                                                                                                                                                                                                                                                      |  |  |  |  |  |  |  |
| 105                                            | Card No                      | Yes..... 1<br>No..... 2                                                                                                                                                                                                                                                                                                                                                                                                     |  |  |  |  |  |  |  |
| <b>Section 2: The date of the prescription</b> |                              |                                                                                                                                                                                                                                                                                                                                                                                                                             |  |  |  |  |  |  |  |
| 201                                            | Date                         | Yes..... 1<br>No..... 2                                                                                                                                                                                                                                                                                                                                                                                                     |  |  |  |  |  |  |  |
| <b>Section 3: Prescriber's Identity</b>        |                              |                                                                                                                                                                                                                                                                                                                                                                                                                             |  |  |  |  |  |  |  |
| 301                                            | Name                         | Yes..... 1<br>No..... 2                                                                                                                                                                                                                                                                                                                                                                                                     |  |  |  |  |  |  |  |
| 302                                            | Qualification                | Yes..... 1<br>No..... 2                                                                                                                                                                                                                                                                                                                                                                                                     |  |  |  |  |  |  |  |
| 303                                            | Signature                    | Yes..... 1<br>No..... 2                                                                                                                                                                                                                                                                                                                                                                                                     |  |  |  |  |  |  |  |
| <b>Section 4: Prescribed drug name</b>         |                              |                                                                                                                                                                                                                                                                                                                                                                                                                             |  |  |  |  |  |  |  |
| 401                                            | Prescribed in a generic name | Yes..... 1<br>No..... 2                                                                                                                                                                                                                                                                                                                                                                                                     |  |  |  |  |  |  |  |
| <b>Section 5: Drug information</b>             |                              |                                                                                                                                                                                                                                                                                                                                                                                                                             |  |  |  |  |  |  |  |
| 501                                            | Dose                         | Yes..... 1<br>No..... 2                                                                                                                                                                                                                                                                                                                                                                                                     |  |  |  |  |  |  |  |
| 502                                            | Frequency                    | Yes..... 1<br>No..... 2                                                                                                                                                                                                                                                                                                                                                                                                     |  |  |  |  |  |  |  |
| 503                                            | Route                        | Yes..... 1<br>No..... 2                                                                                                                                                                                                                                                                                                                                                                                                     |  |  |  |  |  |  |  |
| 504                                            | Quantity and/or duration     | Yes..... 1<br>No..... 2                                                                                                                                                                                                                                                                                                                                                                                                     |  |  |  |  |  |  |  |
| 505                                            | Abbreviation                 | Yes..... 1<br>No..... 2                                                                                                                                                                                                                                                                                                                                                                                                     |  |  |  |  |  |  |  |
| <b>Section 6: Legibility Grading</b>           |                              |                                                                                                                                                                                                                                                                                                                                                                                                                             |  |  |  |  |  |  |  |
| 601                                            | Legibility score             | Grade One ..... 1<br>Grade Two..... 2<br>Grade Three..... 3<br>Grade Four..... . 4                                                                                                                                                                                                                                                                                                                                          |  |  |  |  |  |  |  |
